# Supplementary material for: A flexible self-poled piezocomposite nanogenerator based on H2(Zr0.1Ti0.9)3O7 nanowires and polylactic acid biopolymer
Source: Royal Society of Chemistry journal article supplement (doi:10.1039/d2se00234e), 2022-01-01
Supplement: d2se00234e3.pdf [file d2se00234e3.pdf]

## Supplementary Information

### **A flexible self-poled piezocomposite nanogenerator based on $\text{H}_2(\text{Zr}_{0.1}\text{Ti}_{0.9})_3\text{O}_7$ nanowires and polylactic acid biopolymer**

Zouhair Hanani,<sup>a,b,c,\*</sup> Ilyasse Izanzar,<sup>a</sup> Soukaina Merselmiz,<sup>a</sup> Taha El Assimi,<sup>a,d</sup> Daoud Mezzane,<sup>a,e</sup> M'barek Amjoud,<sup>a</sup> Hana Uršič,<sup>c</sup> Uroš Prah,<sup>c</sup> Jaafar Ghanbaja,<sup>f</sup> Ismael Saadouné,<sup>a,d</sup> Mohammed Lahcini,<sup>a,d</sup> Matjaž Spreitzer,<sup>c</sup> Damjan Vengust,<sup>c</sup> Mimoun El Marssi,<sup>e</sup> Zdravko Kutnjak,<sup>c</sup> Igor A. Luk'yanchuk,<sup>e,g</sup> and Mohamed Gouné<sup>b</sup>

<sup>a</sup> IMED-Lab, Cadi Ayyad University, Avenue Abdelkrim El Khattabi, P.B. 549, Marrakesh, 40000, Morocco

<sup>b</sup> ICMCB, University of Bordeaux, 87 Avenue du Dr Albert Schweitzer, Pessac, 33600, France

<sup>c</sup> Jozef Stefan Institute, Jamova cesta 39, Ljubljana, 1000, Slovenia

<sup>d</sup> Mohammed VI Polytechnic University, Lot 660-Hay Moulay Rachid, Ben Guerir, 43150, Morocco

<sup>e</sup> LPMC, University of Picardy Jules Verne, 33 rue Saint Leu, Amiens, 80039, France

<sup>f</sup> IJL, University of Lorraine, 54000, Nancy, France

<sup>g</sup> Department of Building Materials, Kyiv National University of Construction and Architecture, Kyiv, 03680, Ukraine

\* Corresponding author: e-mail: [zouhair.hanani@ijs.si](mailto:zouhair.hanani@ijs.si)

## S1. Effect of HZTO-nw@PDA concentration

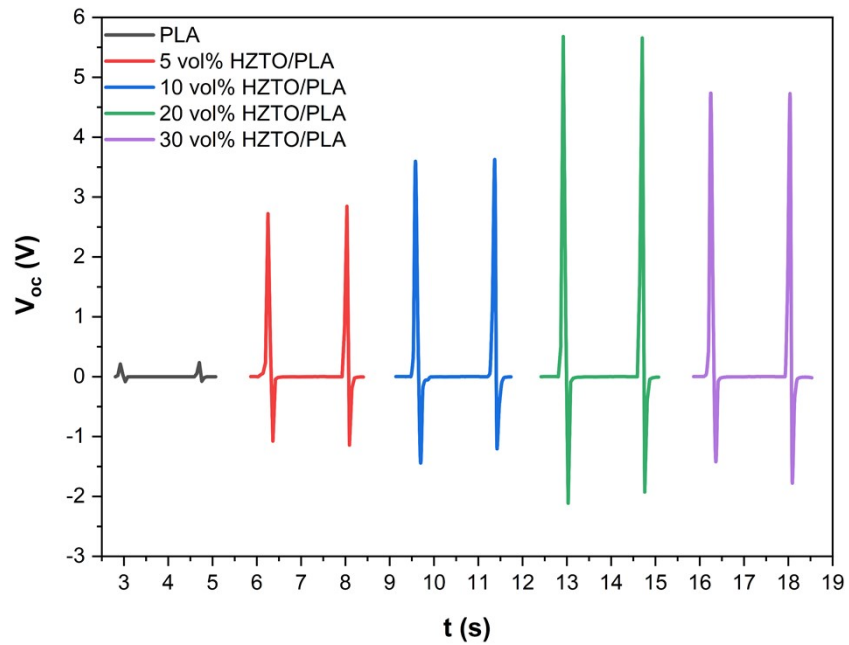

**Fig. S1** Output voltage of HZTO-nw@PDA/PLA nanocomposite film-based nanogenerator with different HZTO-nw@PDA concentrations.

## S2. Switching polarity test of the nw-PNG

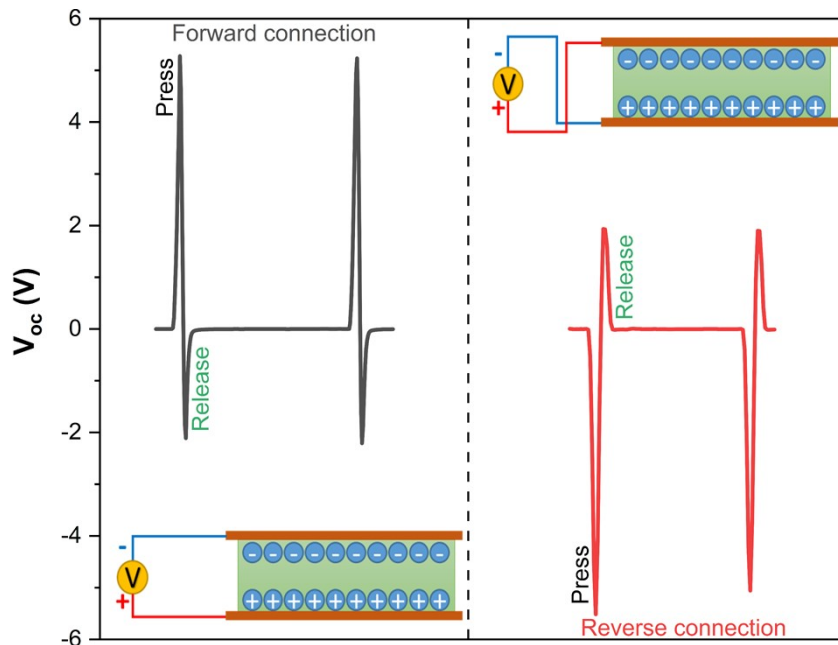

**Fig. S2** The generated open-circuit voltage when the external circuit is connected in the forward and reverse directions.

### S3. Switching polarity test of the nw-PNG

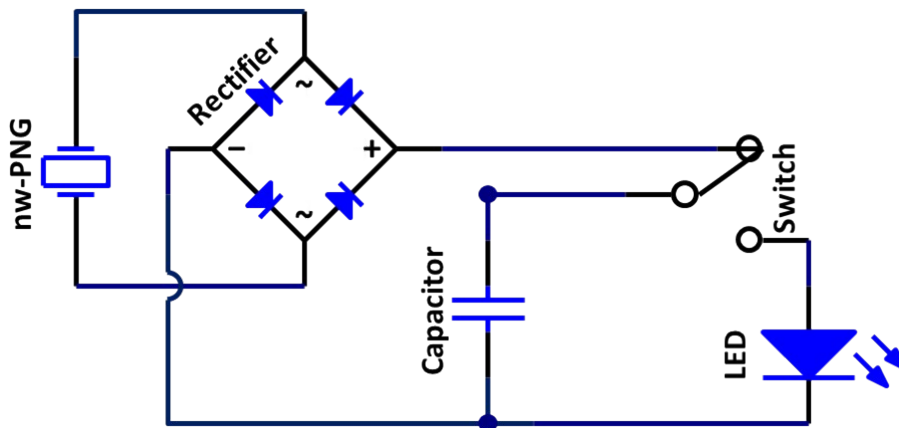

Fig. S3 Schematic circuit diagram for powering the red LED using the nw-PNG.

### S4. Supporting videos

- **Video S1:** Lighting a red LED using finger tapping.
- **Video S2:** Lighting a red LED using folding/unfolding motions.
